# Supplementary material for: Cognitive function and cardiometabolic disease risk factors in rural South Africa: baseline evidence from the HAALSI study
Source: PubMed Central journal article supplement (PMC6882146; doi:10.1186/s12889-019-7938-z), 2019-11-27
Supplement: 12889_2019_7938_MOESM1_ESM.pdf [file 12889_2019_7938_MOESM1_ESM.pdf]

**Additional file 1.** Linear regression of cognitive function (total score) on cardiometabolic indicators, sociodemographic factors, and behavioral and other risk factors, HAALSI participants, Agincourt, 2014-2015 (N=3018). Model includes an interaction between hypertension and age group (<55 years and ≥55 years of age).

|                                                        | Beta  | 95% CI         | p-value |
|--------------------------------------------------------|-------|----------------|---------|
| <b>Cardiometabolic indicators</b>                      |       |                |         |
| BMI <sup>a</sup>                                       |       |                |         |
| Underweight                                            | -0.91 | [-1.52, -0.29] | 0.004   |
| Normal                                                 | Ref   |                |         |
| Overweight                                             | 0.69  | [0.35, 1.03]   | <0.001  |
| Obese                                                  | 0.91  | [0.55, 1.27]   | <0.001  |
| Hypertension <sup>b</sup>                              |       |                |         |
| Without hypertension                                   | Ref   |                |         |
| Hypertension, controlled on Rx                         | 0.61  | [-0.26, 1.48]  | 0.171   |
| Hypertension, not controlled not on Rx                 | -0.29 | [-0.77, 0.19]  | 0.237   |
| Hypertension, not controlled on Rx                     | 1.13  | [0.37, 1.90]   | 0.004   |
| Hypertension <sup>b</sup> X age group ≥55 years of age |       |                |         |
| Hypertension, controlled on Rx                         | -0.33 | [-1.32, 0.65]  | 0.508   |
| Hypertension, not controlled not on Rx                 | 0.34  | [-0.29, 0.97]  | 0.288   |
| Hypertension, not controlled on Rx                     | -1.39 | [-2.27, -0.51] | 0.002   |
| Dyslipidemia                                           |       |                |         |
| No                                                     | Ref   |                |         |
| Yes                                                    | 0.1   | [-0.17, 0.37]  | 0.47    |
| Diabetes <sup>c</sup>                                  |       |                |         |
| Without diabetes                                       | Ref   |                |         |
| Diabetes, controlled on Rx                             | -0.98 | [-1.90, -0.06] | 0.037   |
| Diabetes, not controlled not on Rx                     | -0.79 | [-1.38, -0.21] | 0.007   |
| Diabetes, not controlled on Rx                         | -0.14 | [-0.93, 0.64]  | 0.717   |
| Stroke                                                 |       |                |         |
| No                                                     |       |                |         |
| Yes                                                    | -1.02 | [-1.84, -0.20] | 0.015   |
| <b>Cardiometabolic-related behavioral risk factors</b> |       |                |         |
| Alcohol frequency                                      |       |                |         |
| Does not currently drink                               |       |                |         |
| Less than daily                                        | -0.47 | [-0.85, -0.09] | 0.016   |
| 5-6 days per week/ daily                               | 0.42  | [-0.20, 1.04]  | 0.18    |
| Smoking status                                         |       |                |         |
| Never                                                  |       |                |         |
| Former                                                 | -0.63 | [-1.04, -0.21] | 0.003   |
| Current                                                | -0.52 | [-1.05, 0.01]  | 0.057   |

Adjusted for age, sex, nationality, marital status, employment status, education, wealth asset index, HIV and ART status, and CES-D score.

<sup>a</sup> obese  $\geq 30$  BMI; overweight BMI 25 to  $<30$ ; normal BMI 18.5 to  $<25$ ; underweight BMI  $<18.5$ .

<sup>b</sup> Without hypertension: having a mean systolic blood pressure of  $<140$  mmHg and diastolic blood pressure of  $<90$  mmHg and reported not on treatment; hypertension, controlled on Rx: having a mean systolic blood pressure of  $<140$  mmHg and diastolic blood pressure of  $<90$  mmHg and reported on treatment; Hypertension, not controlled not on Rx: having a mean systolic blood pressure of  $\geq 140$  mmHg or diastolic blood pressure of  $\geq 90$  mmHg and reported not on treatment; Hypertension, not controlled on Rx: having a mean systolic blood pressure of  $\geq 140$  mmHg or diastolic blood pressure of  $\geq 90$  mmHg and reported on treatment.

<sup>c</sup> Without diabetes: having random glucose  $<11.1$  mmol/L and reported not on treatment; diabetes, controlled on Rx: having random glucose  $<11.1$  mmol/L and reported on treatment; diabetes, not controlled not on Rx: having elevated random glucose  $\geq 11.1$  mmol/L and reported not on treatment; diabetes, not controlled on Rx: having elevated random glucose  $\geq 11.1$  mmol/L and reported on treatment.
